# Supplementary material for: Prevalence of Mycobacterium kansasii in clinical and environmental isolates, a systematic review and meta-analysis
Source: Front Microbiol. 2024 Feb 19;15:1321273. doi: 10.3389/fmicb.2024.1321273 (PMC10911025; doi:10.3389/fmicb.2024.1321273)
Supplement: Supplementary file 1 [file Table_1.XLSX]

## Sheet: Clinical
	Quality score	Author	Published Year	Year of collection	Country	Continent	Total isolate number	Total NTM	M.kansasii	Method of Detection	Method
1	5	Claire Andre ́jak	2007	1992 to 2002	France	Europe		31	4	Culture	Genotypic	Pulmonary
2	6	Tefera Agizew	2017	2012 to 2014	Botswana	Africa		180	1	CM/AS	Genotypic	Pulmonary
3	6	Getahun Abate	2021	2005 to 2015	United States	North America		297	23	Culture	Phenotypic	Pulmonary
4	9	Tatjana Adzic‑Vukicevic	2018	2009 to 2016	Serbia	Europe		296	15	CM/AS	Genotypic
5	6	Suhail Ahmad	2019			Asia		53	10	PCR sequencing	Genotypic
6	7	Kwangjin Ahn	2021	2007 to 2019	Korea	Asia		2984	33	GenoBlot Assay	Genotypic
7	8	Mohammed Al Houqani	2011		Canada	North America		4364	223	Chromatography	Phenotypic
8	8	Sara H. Al-Mahruq	2009	2006 to 2007	Oman	Asia		13	1	Inno-Lipa	Genotypic	Pulmonary
9	8	FERNANDO ALCAIDE	1999	1999	Spain	Europe	120	24	14	BACTEC	Phenotypic
10	8	Fernando Alcaide	2003	2000 to 2001	Spain	Europe	2048	61	30
11	5	Ani AE	2011		Nigeria	Africa	80	2	1	DNA probe	Genotypic	Pulmonary
12	7	Silvia Attorri	1999	1995 to 1998	United States	North America	998		94
13	7	Arnold Bainomugisa	2015	2012 to 2013	Uganda	Africa	241		1	DNA probe	Genotypic	Pulmonary
14	6	W. H. Benjamin Jr	1998	1997	United States	North America	488		5	BACTEC 460	Phenotypic
15	8	Can Bicmen	2010	2004 to 2009	Turkey	Asia	45891	77	7	BACTEC 960	Phenotypic
16	7	Can Bicmen	2011	2006 to 2008	Turkey	Asia	1230		1	BACTEC 960	Phenotypic	Pulmonary
17	9	PeggyBlanc	2016	2002 to 2013	France	Europe		170	18	DNAprobes	Genotypic
18	9	Ethan E. Bodle	2008	2000 to 2003	United States	North America		505	12	Culture	Phenotypic
19	8	E. Braun	2012	2004 to 2010	Israel	Asia		21	7	PCR sequencing	Genotypic	Pulmonary
20	4	Barbara A	2021	2018 to 2019	United States	North America		131	6	PCR sequencing	Genotypic
21	3	Barbara A.	2017	2014 to 2015	United States	North America		312	7	PCR sequencing	Genotypic
22	7	Dong-Ryeol Chae	2010	2006 to 2007	Korea	Asia		64	4	PCR-RFLP	Genotypic	Pulmonary
23	7	Jingjing Chai	2022	2013 to 2020	China	Asia		118	10	BACTEC 960	Phenotypic
24	6	Chen-Yuan Chiang	2015	2007 to 2010	Taiwan	Asia		500	49	Culture	Phenotypic	Pulmonary
25	6	Michael P Chou	2014	2001 to 2011	Australia	Oceania		6599	188	CM/AS	Genotypic
26	5	Nancy Cort_x0013_es-Torres	2013	2007 to 2008	Mexico	North America		23	2	PCR sequencing	Genotypic
27	7	M. Dailloux	2006	2001 to 2003	France	Europe		262	34
28	8	Sivasankar Das	2022	2018 to 2022	India	Asia		9	1			Pulmonary
29	8	Mehdi Davari	2018	2013 to 2015	Iran	Asia		61	6	PCR sequencing	Genotypic
30	7	MarianneDebrunner	1992	1983 to 1988.	Switzerland	Europe		513	35
31	7	Ginevra Del Giudice	2010	2006 to 2009	Italy	Europe		55	11	AccuProbe	Genotypic	Pulmonary
32	8	Prabha Desikan	2016	2013 to 2015	India	Asia	4095	26	1	CM/AS	Genotypic	Pulmonary
33	2	Maura J. Donohue	2021	2014	United States	North America		2787	85
33	8	Bahram Nasr Esfahani	2016	2013	Iran	Asia		30	1
34	8	HongFang	2019		China	Asia	1685	323	31	PCR sequencing	Genotypic	Pulmonary
35	7	Seifu Gizaw Feysia	2020	2018 to 2019	Iran	Asia		8	2	Hybridization Assay	Genotypic	Pulmonary
36	7	F. Franco-A ́lvarez de Luna	2006		Spain	Europe	91		2	Hybridization Assay	Genotypic
37	5	Ahmed Gaballah	2022	2017 to 2018	Egypt	Africa	30	7	3	GenoType Mycobacteria Direct Assay	Genotypic	Pulmonary
38	5	FREDY GAMBOA	1997	1996	Colombia	South America	103		1	DNA-Microarray Analysis	Genotypic	Pulmonary
39	8	Chun-Hai Gao	2022	2012 to 2021	China	Asia		1107	111	BACTEC	Phenotypic
40	9	Zoe Gitti	2011	2000 to 2009	Greece	Europe	12540	290	10
41	9	N.S. Gomathy	2019	2017 to 2018	India	Asia		39	19			Pulmonary
42	8	Reina Hara	2020	2006 to 2018	Japan	Asia		115	16	Hybridization Assay	Genotypic	Pulmonary
43	6	Guiqing He	2022	2019 to 2021	China	Asia		81	14	Boao gene chip method	Genotypic	Pulmonary
44	7	Doris Hillemann	2006	2000 to 2005	Germany	Europe	9558	259	3	GenoType MTBC and the CM/AS assay	Genotypic
45	3	Michael Hombach	2013	2009 to 2011	Switzerland	Europe		126	49	PCR sequencing	Genotypic
46	6	Yun Ji Hong	2011	2008 to 2009	Korea	Asia	2338	1680	19	Real-time PCR	Genotypic
47	7	C-H. Hsiao	2011	1999 to 2009	Taiwan	Asia		58	2
48	6	Jing-jing Huang	2020	2013 to 2018	China	Asia		223	17	PCR sequencing	Genotypic
49	9	Mingxiang Huang	2021	2018 to 2020	China	Asia		218	6	gene chip	Genotypic	Pulmonary
50	7	Joseph Jeong	2014	2005 to 2009	Korea	Asia	24778	388	60	HPLC	Phenotypic
51	5	Junghyun Kim	2015	2010 to 2012	Korea	Asia		730	18	PCR sequencing	Genotypic	Pulmonary
52	5	Min-Jeong Kim	2021	2016 to 2018	Korea	Asia		320	4	PCR sequencing	Genotypic
53	8	Young-gon Kim	2021	2011 to 2020	Korea	Asia		9364	114	PCR sequencing	Genotypic
54	5	Masahiro Kodana	2016	2013 to 2014	Japan	Asia		75	14	MALDI-TOF	Phenotypic	Pulmonary
55	6	F. Kontos	2003	1997 to 2004	Greece	Europe		35	3	BACTEC 960	Phenotypic
56	7	Chih-Cheng Lai	2005	1997 to 2004	Taiwan	Asia		15	3	PCR sequencing	Genotypic
57	4	R. Lan	2011	2005 to 2008	China	Asia		102	8	PCR sequencing	Genotypic	Pulmonary
58	7	EunHwaLee	2022	2000 to2021	Korea	Asia		51	3	PCR-RFLP	Genotypic
59	9	M.-R. Lee MD	2015	2007 to 2012	Taiwan	Asia		202	21	Biochemical	Phenotypic	Pulmonary
60	6	Jian Lin	2022	2018 to 2019	China	Asia	261	202	9	BACTEC MGIT 960	Phenotypic
61	5	S.-H. LIN	2013	1001 to 2009	Taiwan	Asia	24	11	3	Biochemical	Phenotypic
62	7	Liao	2007	1997 to 2004	Taiwan	Asia		63	5	BACTEC MGIT 960	Phenotypic
63	8	Chun‑Fa Liu	2021	2012	China	Asia		317	31	PCR sequencing	Phenotypic	Pulmonary
64	7	ANTÓ NIO AMORIM	2010	2008 to 2009	Portugal	Europe		58	6	CM/AS	Genotypic	Pulmonary
65	7	Anastasios Loizos	2018	2007 to 2016	Cyprus	Europe		22	1	CM/AS	Genotypic	Extra- pulmonary
66	7	P López-Roa	2020	2013 to 2017	Spain	Europe		4535	67			Pulmonary
67	4	Katja Lucke†	2012				26		10	PCR sequencing	Genotypic
68	5	Jingjing Luo	2018	2015 to 2016	China	Asia		209	45
69	7	Mahdavi	2021	2018 to 2019	Iran	Asia	57	13	1	PCR sequencing	Genotypic	Pulmonary
70	5	Katerina Manika	2015	1990 to 2013	Greece	Europe		73	9	BACTEC	Phenotypic	Pulmonary
71	3	Lilian Regina Macelloni Marques	2019	2011 to 2014	Brazil	South America		2843	453	PCR-RFLP	Genotypic	Pulmonary
72	8	Chung-Yu Chen	2011	2005 to 2008	Taiwan	Asia		312	36	BACTEC MGIT 960	Phenotypic	Pulmonary
73	6	N. Martín-Casabona	2004	1976 to 1996				30 969	4472
74	9	Eliana Dias Matos	2004	1998 to 2003	Brazil	South America	231	19	3	Culture	Phenotypic	Pulmonary
75	8	Alona Matveychuk	2012	2007 to 2010	Israel	Asia	98	98	64	Culture	Phenotypic	Pulmonary
76	7	W. Mijs	2002			Europe	642		75	LiPA	Genotypic
77	7	Mehdi Mirsaeidi	2013	1999 to 2006	United States	North America		68	2	Culture	Phenotypic	Pulmonary
78	5	Helena Modrá	2019	2012 to 2018	Czech Republic	Europe		2176	134
79	3	Jonathan E Moore	2010	1995 to 2006		Europe		11039	1380
80	8	Hiroki Morita	2004	1998 to 2002	Japan	Asia		60	1	Hybridization Assay	Genotypic	Pulmonary
81	8	Zahra Mortazavi	2019	2015 to 2017	Iran	Asia		53	6	IS6110-PCR	Genotypic	Pulmonary
82	7	Maiko Naito	2018	2010 to 2015	Japan	Asia		62	20	Culture	Phenotypic	Pulmonary
83	6	Yuan Chiang	2015	2007 to 2010	Taiwan	Asia	4206	890	49	Culture	Phenotypic
84	9	M.J. nasiri	2018	2014 to 2016	Iran	Asia	410	62	11	PCR restriction analysis (PRA)	Genotypic	Pulmonary
85	7	Shanna Shan-Yi Ng	2015	2002 to 2012	Singapore	Asia		8	1	culture	Phenotypic
86	7	N. Ose	2016	2000 to 2012	Japan	Asia		25	1	culture	Phenotypic
87	7	Naoko Ose	2021	2000 to 2017	Japan	Asia		101	8
88	4	YU PANG	2017	2011 to 2015	China	Asia		685	84	multilocus sequence analysis	Genotypic
89	5	David M. Parenti	1995	1980 to 1990	United States	North America	287		13
90	8	Sojung Park	2017	1997 to 2013	Korea	Asia		14	1	BACTEC	Phenotypic	Pulmonary
91	9	Sandra Pedrero	2019	1997 to 2016	Spain	Europe		327	274
92	8	Paro Pedro	2008	1996 to 2005	Brazil	South America	1300	317	7
93	7	Catherine Pierre-Audigier	2005	2000	France	Europe		31	2	Culture	Phenotypic	Pulmonary
94	5	Therdsak Prammananan	2005	2000 to 2004	Thailand	Asia	541	491	37
95	5	NALIN RASTOG	1992				552		94	Culture	Phenotypic
96	7	Fabiane N. Riello	2016	2013 to 2014	Brazil	South America		18	2	PCR-RFLP	Genotypic	Pulmonary
97	7	J.C. Rodriguez Dı ́az	2003	1995 to 2002	Spain	Europe		108	8	Culture	Phenotypic
98	7	M. RUI ́Z	2001	1995 to 2001	Spain	Europe		150	15			Pulmonary
99	8	Sung Weon Ryoo	2008	1993 to 2006	Korea	Asia		10242	584	Biochemical	Phenotypic
100	7	M. Saifi	2013	2010 to 2011	Iran	Asia		32	9	PCR-RFLP	Genotypic
101	7	Claudio Scarparo	2002		Italy	Europe		75	4	BACTEC 960	Phenotypic
102	6	Robert W	1992	1981 to 1990				86	7	Biochemical	Phenotypic
103	7	Yan Shao	2015	2008	China	Asia		60	4	CM/AS assay	Genotypic	Pulmonary
104	6	G-H. Shen	2008	2006	Taiwan	Asia		335	71	BACTEC	Phenotypic
105	6	S. Shenai	2010	2005 to 2008	India	Asia		133	5	genotypic	Genotypic
106	8	Leslie C. Sheu	2014	1993 to 2001	United States	North America		650	99	Culture	Phenotypic
107	5	L Sookan	2014	2010	South Africa	Africa		133	6	CM/AS	Genotypic
108	6	Sorlozano, Antonio	2009	2008	Spain	Europe	1770	21	6	Culture	Phenotypic
109	6	Sayaka Takenaka,	2019	2003 to 2013	Japan	Asia		17	1			Pulmonary
110	8	Yaoju Tan	2018	2013 to 2017	China	Asia		607	61	PCR sequencing	Genotypic	Pulmonary
111	8	KalpanaThangavelu	2021	2018 to 2020	India	Asia	7633	79	10	lineprobeassay	Genotypic	Pulmonary
112	6	Rachel M.Thomson	2020	2001 to 2016	Australia	Oceania		12219	293	GenoType Mycobacterium A	Genotypic
113	8	Khosravi	2020	2016 to 2018	Iran	Asia		108	33			Pulmonary
114	7	Hui-Zin Tu	2003	2001 to 2001	Taiwan	Asia	1372	468	56	The BDProTecET system	Genotypic
115	9	Urabea	2021	2017 to 2019	Japan	Asia		37	2	Culture	Phenotypic
116	3	Ingen	2009	2000 to 2007	Netherland	Europe		2275	262	INNO-LiPA	Genotypic
117	8	Jie Wu	2014	2008 to 2012	China	Asia		616	277	PCR sequencing	Genotypic	Pulmonary
118	7	Jintian Xu	2019	2008 to 2018	China	Asia	390	24	2	PCR sequencing	Genotypic	Pulmonary
												Origin of sample

## Sheet: Environment
	Quality score	Author	Published Year	Year of collection	Country	Continent	Total isolate number	M.kansasii	Method of Detection	Sample	Origin of sample	Place
1	3	Ba ́rbara Adrados	2010		Spain	Europe	53	1	Quantitative PCR	Water	cooling towers	Urban
2	6	H. W. B. Engel	1980	1975 to 1976	Netherlands	Europe	78	38	Biochemical	Water	Tapwater	Many
3	6	E. Ghaemi	2006	2001	Iran	Asia	161	1	Biochemical	Soil
4	3	HowardGruft	1981		United States	North America	520	0	Biochemical	Water		Coast
5	8	EILA IIVANAINEN	1999	1996	Finland	Europe	30	1	Fatty acid analysis	Water	Indoor swimming pools
6	7	Igor Kubalek	1995		Czech Republic	Europe	686	0	Biochemical	Water	Drinking water	Many
7	7	Geoffrey Kwenda	2015	2006 to 2007	South Africa	Africa	88	5	AccuProbe assay		Water and biofilm	Mine
8	6	D. A. MCSWIGGAN	1974		England	Europe	65	18	Cultures	Water		Hospital
							13	6			Drinking
							20	8			Cold
							11	1			Hot
							16	0			Mixer
9	8	Sina Moghaddam	2022	2022	Iran	Asia	198	18	Biochemical	Water	Various sites	Hospital
10	9	Deepti Parashar	2007	1998 to 2000	India	Asia	116	0	Biochemical	Soil	Many	Habitats
							175	1	Biochemical	Water
11	7	R. Santos	2055	2003	Portugal	Europe	38	2	Genotype	Water	Cold water taps	Urban area
12	9	Helena Sebakova	2008	2006	Czech Republic	Europe	120	15		Water	Hot Drinking Water	Hospital
13		Anjana Sharma	2007		India	Asia	21	1	TLC	Water	Drinking water	School and Colleges
14		M Sloshek	1996		Czech Republic	Europe	10	5	Gas chromatography	Water	Shower-heads	Coal miners’ changing rooms
15		Vincent Thomas	2006	2004	Switzerland	Europe	200	3	sequencing of the 16S rRNA	Water		Hospital
16		E. P. Wright,	1985		London	Europe	69	14	Culture	Water		Hospital
							22	6			Cold taps
							24	6			Mixer taps
							23	2			Hot taps
